# Supplementary material for: The predictability of fluctuating environments shapes the thermal tolerance of marine ectotherms and compensates narrow safety margins
Source: PubMed Central journal article supplement (PMC11526141; doi:10.1038/s41598-024-77621-1), 2024-10-30
Supplement: 41598_2024_77621_MOESM1_ESM.pdf [file 41598_2024_77621_MOESM1_ESM.pdf]

1 **Supplementary Material**

2

3 **The predictability of fluctuating environments shapes the thermal tolerance of marine**  
4 **ectotherms and compensates for narrow safety margins**

5 Authors:

6 Marco Fusi<sup>1,2,3,\*†</sup>, Alberto Barausse<sup>4,5,6</sup> Jenny Marie Booth<sup>7,8</sup> Erica Chapman<sup>9</sup>, Daniele  
7 Daffonchio<sup>2</sup>, William Sanderson<sup>10</sup>, Karen Diele<sup>3,11</sup>, Folco Giomi<sup>12\*†</sup>,

8 Affiliation:

9 1 Dove Marine Laboratory, School of Natural and Environmental Sciences, Newcastle University,  
10 Newcastle NE1 7RU, UK

11 2 King Abdullah University of Science and Technology (KAUST), Red Sea Research Center  
12 (RSRC), Thuwal 23955-6900, Saudi Arabia

13 3 Centre for Conservation and Restoration Science, Edinburgh Napier University, Sighthill  
14 Campus, Edinburgh, UK

15 4 Department of Biology, University of Padua, via U. Bassi 58/b, 35131 Padova, Italy.

16 5 Department of Industrial Engineering, University of Padova, via Gradenigo 6/a, 35131 Padova,  
17 Italy

18 6 National Biodiversity Future Center (NBFC), Piazza Marina 61, 90133, Palermo, Italy

19 7 Joint Nature Conservation Committee, Monkstone House, City Road, Peterborough, PE1 1JY,  
20 UK

21 8 Coastal Research Group, Department of Zoology and Entomology, Rhodes University, PO Box  
22 94, Grahamstown 6140, South Africa

23 9 St Abbs Marine Station, St Abbs, UK

24 10 Centre for Marine Biodiversity & Biotechnology, ILES, EGIS, Heriot-Watt University,  
25 Edinburgh, UK

26 11 School of Applied Science, Edinburgh Napier University, Sighthill Campus, Edinburgh, UK

27 12 Department of Biology, University of Rome Tor Vergata, Rome, Italy

28 \*Corresponding authors. Email: marco.fusi@newcastle.ac.uk (M.F.); folcog@gmail.com (F.G.)

29 †These authors contributed equally to this work.

30

31

32

33 **Supplementary Figures**

34 **Supplementary figure S1.** Dissolved oxygen concentration and water temperature in the three  
35 locations, Cold, Warm Temperate and Tropical between 2017 and 2018. Oxygen concentration is  
36 plotted for 1°C temperature intervals; the violin plots represent the distribution of the  
37 observations; the red line indicates oxygen concentration at the water saturation (100% of  
38 saturation). The full oxygen frequency distribution data are represented in the Kernel plots on the  
39 left side.

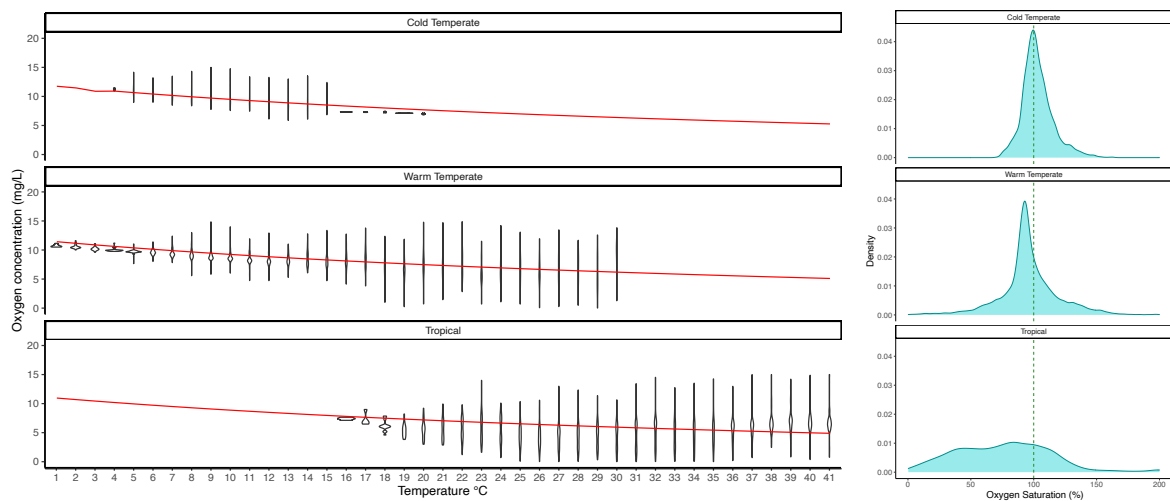

40

41

42 **Supplementary figure S2.** Thermal tolerance of 17 marine species (6 phyla) measured as lethal  
43 temperatures (LT50) for 50% of the individuals exposed to full oxygen saturation (red line) and  
44 supersaturation (cyan line).

A - Cold Temperate

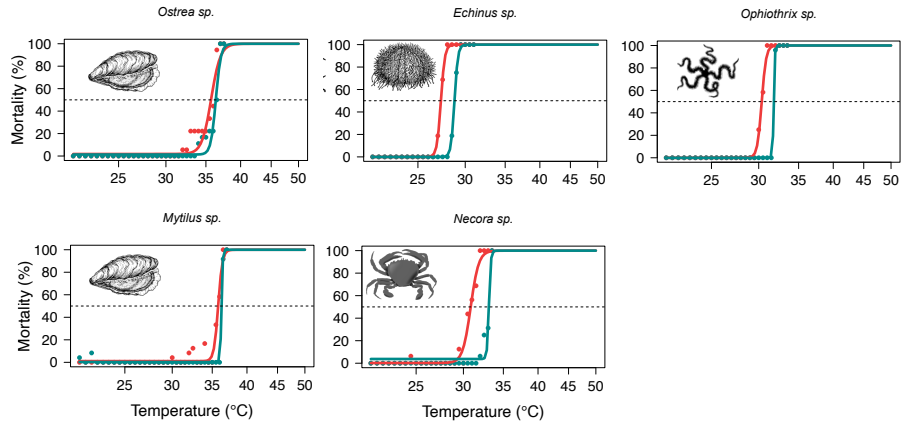

B - Warm Temperate

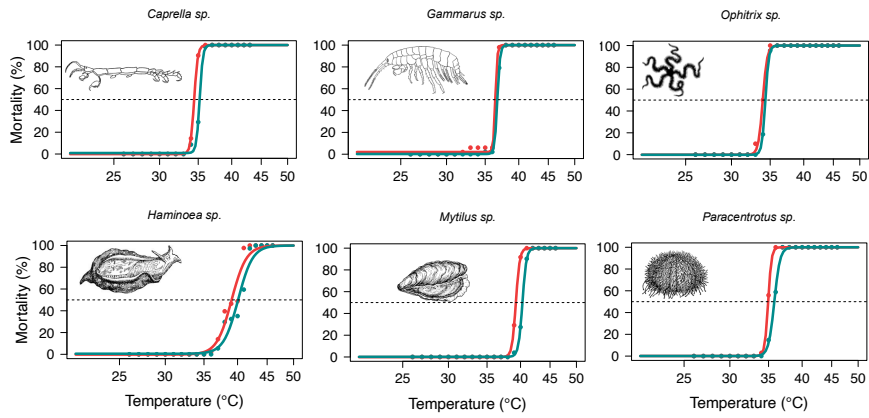

C - Tropical

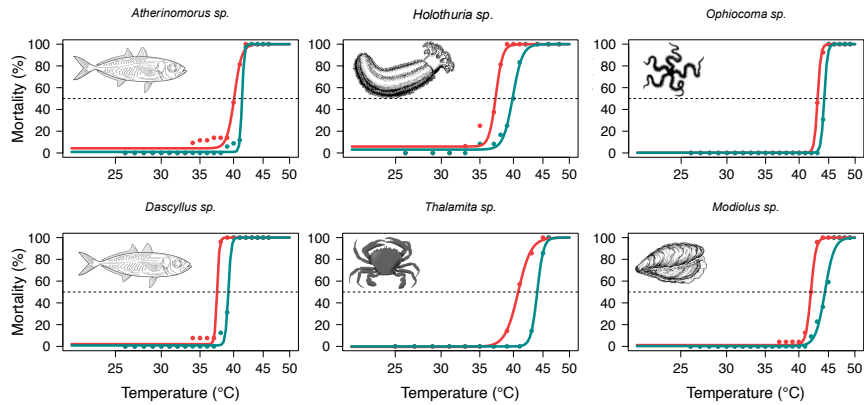

47 **Supplementary figure S3.** Wavelet analysis showing the dominant periodicities of the oxygen  
48 and temperature time series in the three study sites. The horizontal axis represents time and the  
49 vertical axis represents the periodicity of the corresponding oscillation. The paler area is the cone  
50 of influence, where results should not be interpreted due to biases connected to edge effects, and  
51 the thick black contour is the 5% significance level.

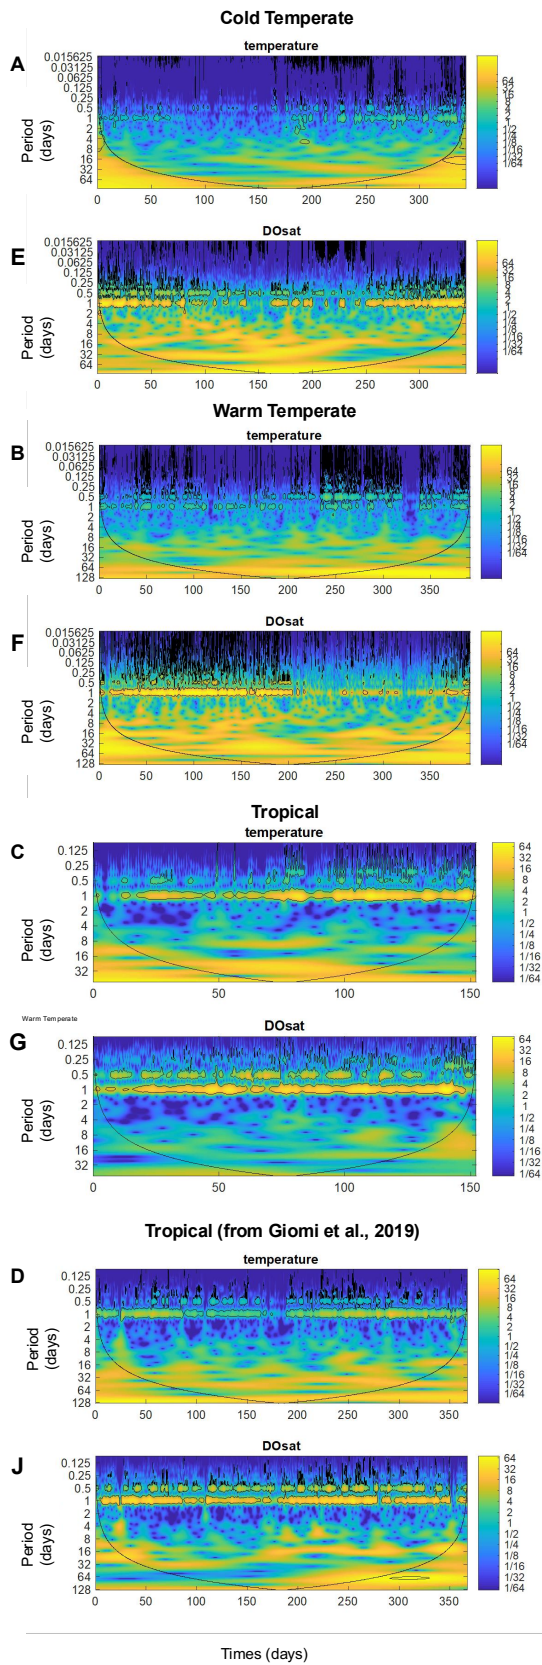

52

53

54

55 Supplementary figure S4. (A-D) Seawater temperature in the Cold Temperate, Warm Temperate  
56 and Tropical coastal sites.

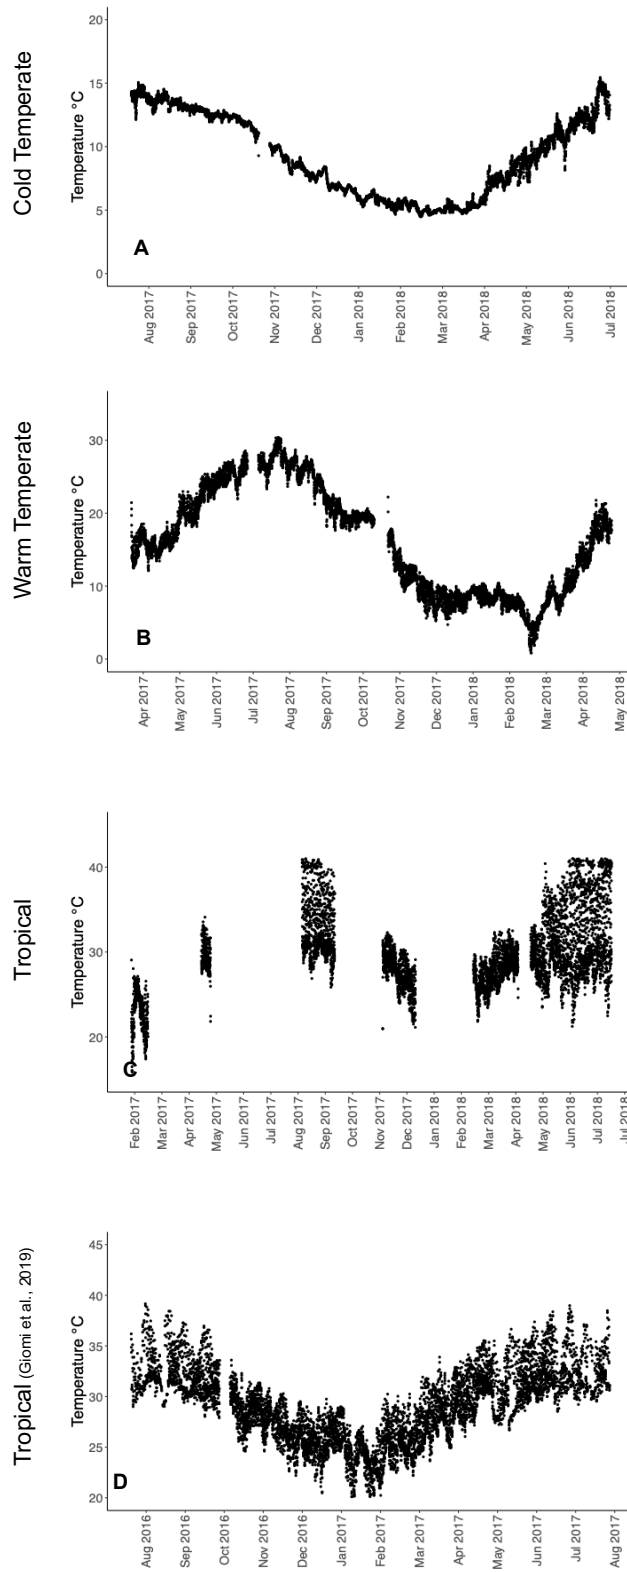

57

58



59 Supplementary Table S6. Statistical analysis for the comparison of LT50 between 97% and 140%  
 60 of water saturation.

| Location          | Species               | Oxygen<br>sSaturation<br>Treatment | LT50<br>Estimate<br>(°C) | Std.<br>Error | t-value | p-value |
|-------------------|-----------------------|------------------------------------|--------------------------|---------------|---------|---------|
| Cold Temperate    | Echinus sp.           | Normal<br>Saturation               | 27.32                    | 0.01          | 4282.45 | <0.001  |
| Cold Temperate    | Echinus sp.           | Supersaturation<br>Normal          | 28.78                    | 0.01          | 4646.30 | <0.001  |
| Cold Temperate    | Ostrea sp.            | Saturation                         | 35.72                    | 0.11          | 313.75  | <0.001  |
| Cold Temperate    | Ostrea sp.            | Supersaturation<br>Normal          | 36.37                    | 0.08          | 461.66  | <0.002  |
| Cold Temperate    | Ophiothrix sp.        | Saturation                         | 30.35                    | 0.01          | 2293.73 | <0.002  |
| Cold Temperate    | Ophiothrix sp.        | Supersaturation<br>Normal          | 31.79                    | 0.03          | 1260.76 | <0.001  |
| Cold Temperate    | Mytilus sp.           | Saturation                         | 35.81                    | 0.03          | 1132.57 | <0.002  |
| Cold Temperate    | Mytilus sp.           | Supersaturation<br>Normal          | 36.29                    | 0.01          | 2487.57 | <0.001  |
| Cold Temperate    | Necora sp.            | Saturation                         | 30.86                    | 0.16          | 198.66  | <0.001  |
| Cold Temperate    | Necora sp.            | Supersaturation<br>Normal          | 33.11                    | 0.08          | 436.47  | <0.001  |
| Warm<br>Temperate | Caprella sp.          | Saturation                         | 34.44                    | 0.02          | 1397.32 | <0.001  |
| Warm<br>Temperate | Caprella sp.          | Supersaturation<br>Normal          | 35.20                    | 0.03          | 1405.96 | <0.002  |
| Warm<br>Temperate | Gammarus sp.          | Saturation                         | 36.45                    | 0.05          | 677.54  | <0.001  |
| Warm<br>Temperate | Gammarus sp.          | Supersaturation<br>Normal          | 36.74                    | 0.04          | 1023.59 | <0.001  |
| Warm<br>Temperate | Haminoea sp.          | Saturation                         | 39.07                    | 0.20          | 194.57  | <0.001  |
| Warm<br>Temperate | Haminoea sp.          | Supersaturation<br>Normal          | 40.09                    | 0.21          | 190.26  | <0.001  |
| Warm<br>Temperate | Mytilus sp.           | Saturation                         | 39.27                    | 0.01          | 5502.75 | <0.002  |
| Warm<br>Temperate | Mytilus sp.           | Supersaturation<br>Normal          | 40.30                    | 0.01          | 5658.16 | <0.001  |
| Warm<br>Temperate | Ophitrix sp.          | Saturation                         | 33.98                    | 0.02          | 1723.51 | <0.001  |
| Warm<br>Temperate | Ophitrix sp.          | Supersaturation<br>Normal          | 34.34                    | 0.02          | 1575.63 | <0.001  |
| Warm<br>Temperate | Paracentrotus sp.     | Saturation                         | 34.94                    | 0.01          | 2336.75 | <0.001  |
| Warm<br>Temperate | Paracentrotus sp.     | Supersaturation<br>Normal          | 35.81                    | 0.02          | 1825.40 | <0.001  |
| Tropical          | Dascyllus sp.         | Saturation                         | 37.47                    | 0.07          | 516.20  | <0.001  |
| Tropical          | Dascyllus sp.         | Supersaturation<br>Normal          | 39.17                    | 0.05          | 827.01  | <0.001  |
| Tropical          | Hatherinomorus<br>sp. | Saturation                         | 40.13                    | 0.08          | 509.36  | <0.001  |
| Tropical          | Hatherinomorus<br>sp. | Supersaturation<br>Normal          | 41.38                    | 0.09          | 439.26  | <0.002  |
| Tropical          | Modiolus sp.          | Saturation                         | 41.97                    | 0.05          | 833.10  | <0.001  |
| Tropical          | Modiolus sp.          | Supersaturation                    | 44.37                    | 0.08          | 587.35  | <0.001  |

|          |                |                   |       |      |         |        |
|----------|----------------|-------------------|-------|------|---------|--------|
| Tropical | Ophiocoma sp.  | Normal Saturation | 43.05 | 0.02 | 2541.81 | <0.001 |
| Tropical | Ophiocoma sp.  | Supersaturation   | 44.21 | 0.02 | 2810.43 | <0.001 |
| Tropical | Holothuria sp. | Normal Saturation | 37.31 | 0.11 | 329.15  | <0.001 |
| Tropical | Holothuria sp. | Supersaturation   | 39.90 | 0.14 | 293.00  | <0.001 |
| Tropical | Thalamita sp.  | Normal Saturation | 40.76 | 0.05 | 850.49  | <0.001 |
| Tropical | Thalamita sp.  | Supersaturation   | 43.98 | 0.04 | 1027.10 | <0.002 |

61

62
